# Supplementary material for: A multi-interface CoNi-SP/C heterostructure for quasi-solid-state hybrid supercapacitors with a graphene oxide-containing hydrogel electrolyte
Source: Royal Society of Chemistry journal article supplement (doi:10.1039/d1ta10138b), 2022-01-01
Supplement: d1ta10138b1.pdf [file d1ta10138b1.pdf]

## Electronic Supplementary Information

### **A multi-interface CoNi-SP/C heterostructure for quasi-solid-state hybrid supercapacitor with a graphene oxide-containing hydrogel electrolyte**

Zixiao Li<sup>a</sup>, Chenchen Ji<sup>a,\*</sup>, Fengjiao Guo<sup>a</sup>, Hongyu Mi<sup>a,\*</sup>, Xiaoqing Zhu<sup>a</sup>, Jieshan Qiu<sup>b,\*</sup>

<sup>a</sup> School of Chemical Engineering and Technology, Xinjiang University, Urumqi 830046, Xinjiang, People's Republic of China

<sup>b</sup> State Key Laboratory of Chemical Resource Engineering, College of Chemical Engineering, Beijing University of Chemical Technology, Beijing 100029, People's Republic of China

\*Corresponding author. E-mail: Hongyu Mi, mmihongyu@163.com; Chenchen Ji, jichenchen2010@163.com; Jieshan Qiu, qiujs@mail.buct.edu.cn

## 1. Experimental Section

### 1.1. Preparation of CoNi-MOF

CoNi-MOF precursor was prepared by a reported solvothermal method.<sup>1</sup> Typically, 1 mmol  $\text{Co}(\text{NO}_3)_2 \cdot 6\text{H}_2\text{O}$  and 1 mmol  $\text{Ni}(\text{NO}_3)_2 \cdot 6\text{H}_2\text{O}$  were dissolved in 30 mL N, N-dimethylformamide (DMF) under ultra-sonication for 0.5 h. Then, 0.1 g polyvinylpyrrolidone (PVP, MW 58000) and 150 mg trimesic acid ( $\text{H}_3\text{BTC}$ ) were added into the above salt-containing organic solvent under magnetic stirring for another 0.5 h. After that, the solvent was poured into 50 mL Teflon-lined stainless-steel autoclave and heated at 150 °C for 6 h. The final CoNi-MOF was washed with ethanol for several times, and dried at 60 °C.

### 1.2. Preparation of CoNi-SP/C, CoNi-P/C, and CoNi-S/C.

CoNi-SP/C was synthesized by chemical vapor deposition (CVD). 20 mg CoNi-MOF and 200 mg mixed  $\text{NaH}_2\text{PO}_2 \cdot \text{H}_2\text{O}$  and thiourea (mass ratio is 1:2) were located downstream and upstream of the tube furnace. The reaction was performed at 350 °C for 2 h with a speed of 2 °C  $\text{min}^{-1}$ .<sup>2</sup> CoNi-P/C and CoNi-S/C were synthesized by the same method but without thiourea or  $\text{NaH}_2\text{PO}_2 \cdot \text{H}_2\text{O}$ .

### 1.3. Preparation of PVA/PAM/GO

Firstly, 7 mg graphene oxide (GO) was dispersed in 7 mL deionized water by ultra-sonication, then 1 g PVA was dissolved into the above solution at 90 °C for 1 h. After that, 2.1 g acrylamide (AM) monomer, 0.0662 g (2-Hydroxy-4'-(2-hydroxyethoxy)-2-methylpropiophenone), and 1.36 mg N, N'-methylenebisacrylamide (MBA) were added into the PVA/GO suspension and stirred for 10 min. Subsequently, the above mixture was poured into the mold, and stood for 1 h under UV irradiation ( $\lambda = 365$  nm wavelength, intensity of 8 W), finally obtaining the PVA/PAM/GO hydrogel.

#### **1.4. Materials Characterization**

Scanning electron microscopy (SEM, SU-8010) was employed to study the morphologies of various products. Their microstructures were made clear by employing transmission electron microscopy (TEM, 2100F). The phase feature was verified via X-ray diffraction (XRD, Brüker D8 advance), and the elemental components were clarified by X-ray photoelectron spectroscopy (XPS, Thermo Fisher ESCALAB 250Xi). Nitrogen adsorption-desorption apparatus (BSD-PS (M)) was employed for the surface area and pore structure based on the Brunauer-Emment-Teller (BET) method and the nonlocal density functional theory (NLDFT). A Brüker VERTEX70 Fourier transform infrared (FTIR) spectrometer was used to investigate the chemical components.

#### **1.5. Electrochemical Evaluation**

Electrochemical tests were carried out by cyclic voltammetry (CV), galvanostatic charge–discharge (GCD), and electrochemical impedance spectroscopy (EIS) using a CHI660b electrochemical workstation. The cycling durability was examined on a CT2001A LAND tester. The performance of the samples was examined in a conventional three-electrode setup using the Pt counter electrode, Hg/HgO reference electrode, and 2.0 M KOH aqueous electrolyte. Prior to the measurements, the working electrode (WE) based on the obtained sample was prepared by mixing active material, acetylene black, and polytetrafluoroethylene (mass ratio = 8:1:1) in ethanol. The dried mixture was rolled into the sheet, cut into several small sheets, and pressed on the Ni current collector (with the mass loading of  $2.5 \text{ mg cm}^{-2}$ ). The gravimetric capacities ( $Q_g$ ,  $\text{C g}^{-1}$ ) of the samples were calculated from GCD curves using the following equation:<sup>3</sup>

$$Q_g = \frac{2I \int V dt}{mV} \quad (1)$$

where  $I$  (A) stands for the discharge current,  $\int V dt$  (V s) is the integral area under a discharge curve,  $m$  (g) is the mass of the active electrode material, and  $V$  (V) is the potential window. Electrochemical impedance spectroscopy (EIS) tests were recorded in the frequency range of  $10^5$ – $10^{-2}$  Hz. In HSC devices, the mass ratio of active materials in both electrodes was determined based on the charge balance using the formula below:<sup>4</sup>

$$\frac{m_+}{m_-} = \frac{Q_{g-}}{Q_{g+}} \quad (2)$$

where  $m$  (g) is the mass of the active electrode material, and  $Q_g$  (C g<sup>-1</sup>) is the gravimetric capacity. The CoNi-SP/C to AC mass ratio is equal to 1:2.5 in the HSC. The gravimetric capacity ( $Q_{\text{cell}}$ , C g<sup>-1</sup>), energy density ( $E$ , Wh kg<sup>-1</sup>), and power density ( $P$ , W kg<sup>-1</sup>) of the devices were calculated using the formulas below:<sup>5</sup>

$$Q_{\text{cell}} = \frac{2I \int V dt}{mV} \quad (3)$$

$$E = \frac{I \int V dt}{3.6m}$$

(4)

$$P = \frac{3600E}{t}$$

(5)

where  $m$  (g) is the total mass of both active electrode materials,  $V$  (V) is the discharge voltage, and  $t$  (s) is the discharge time.

## 2. Results and discussion

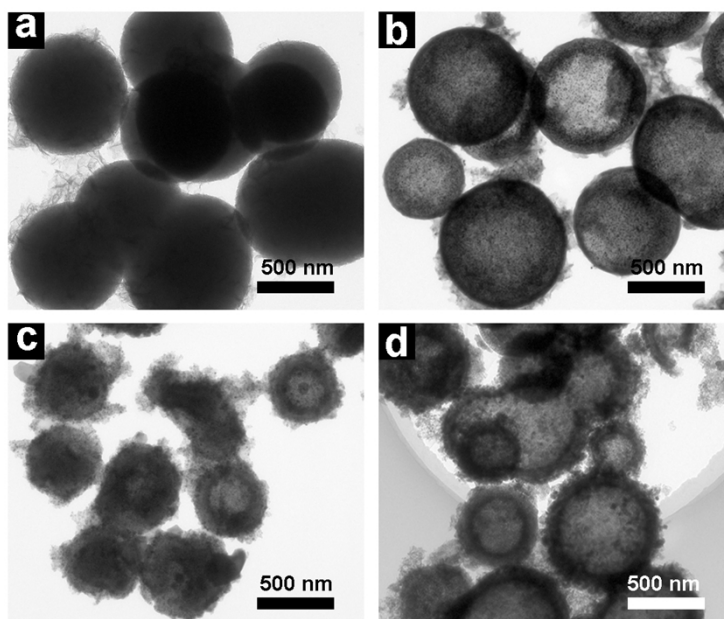

**Fig. S1** TEM images of (a) CoNi-MOF, (b) CoNi-P/C, (c) CoNi-S/C, (d) CoNi-SP/C.

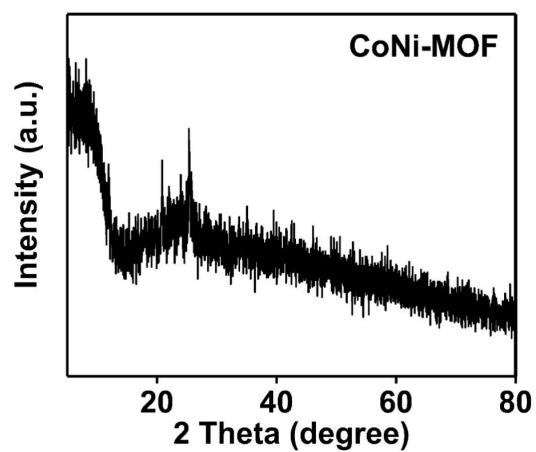

**Fig. S2** XRD pattern of CoNi-MOF.

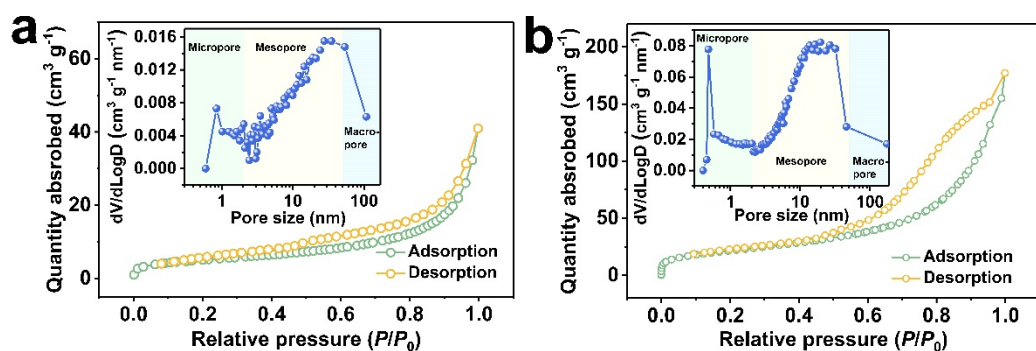

**Fig. S3** Nitrogen adsorption-desorption isotherms and the corresponding pore size distributions (insets) of (a) CoNi-P/C and (b) CoNi-S/C.

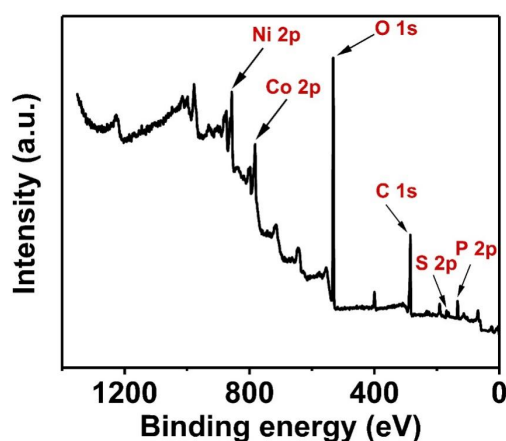

**Fig. S4** XPS survey spectrum of CoNi-SP/C.

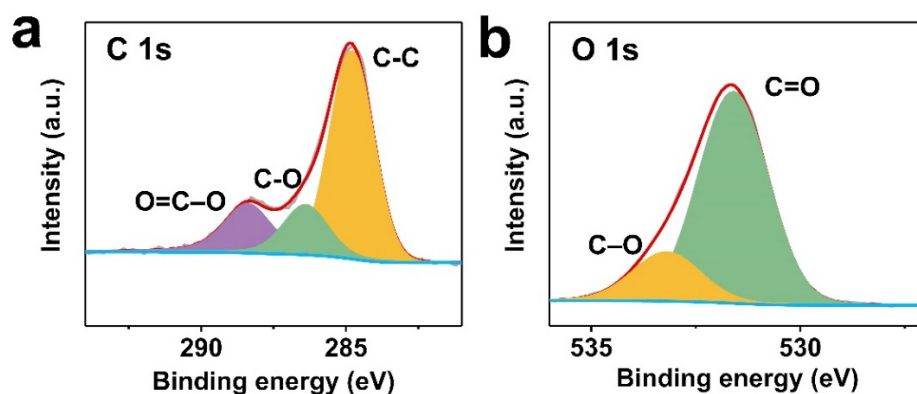

**Fig. S5** XPS spectra of (a) C 1s and (b) O 1s for CoNi-SP/C .

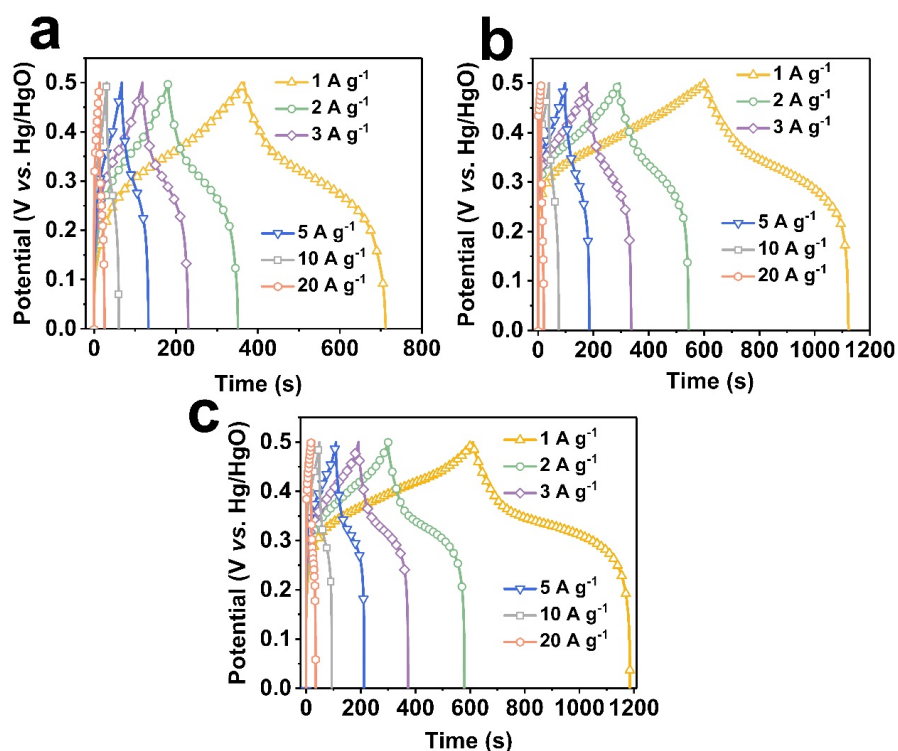

**Fig. S6** GCD curves of (a) CoNi-P/C, (b) CoNi-S/C, and (c) CoNi-SP/C electrodes at 1–20 A g<sup>-1</sup>.

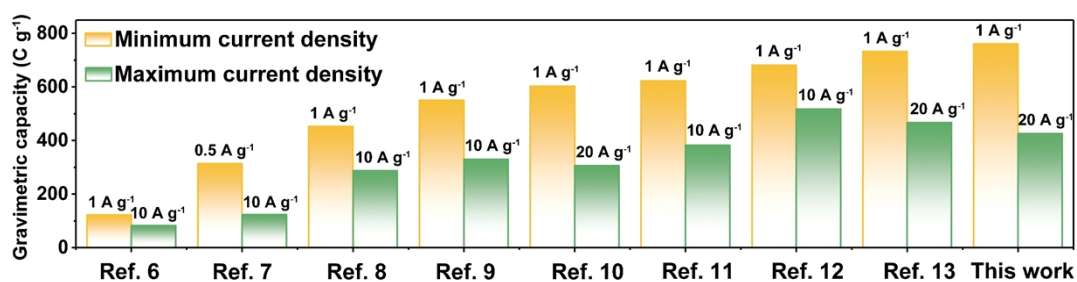

**Fig. S7** The capacity comparison of CoNi-SP/C with other published electrode materials.

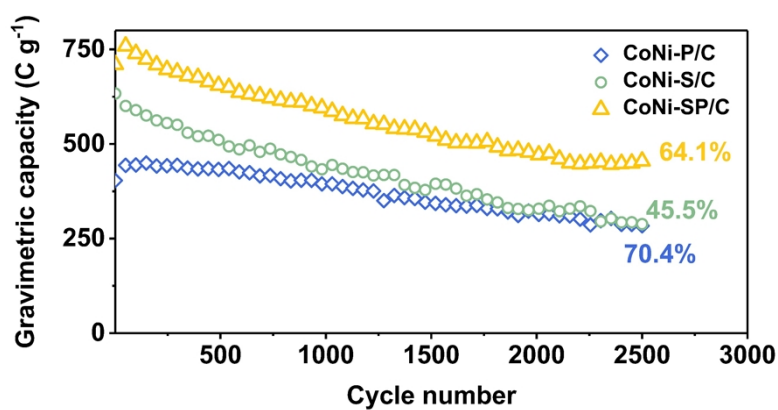

**Fig. S8** Cycling stability for CoNi-P/C, CoNi-S/C, and CoNi-SP/C electrodes.

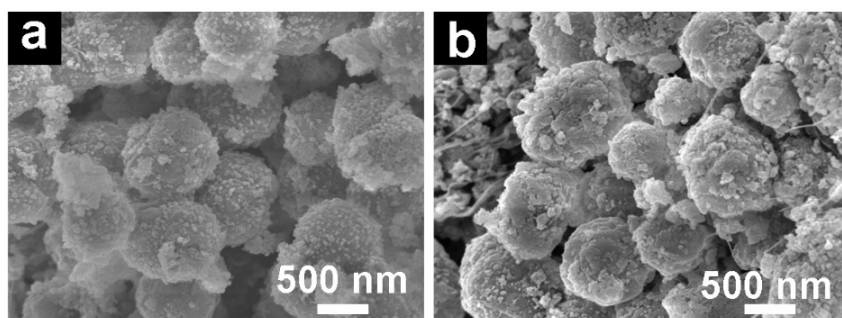

**Fig. S9** SEM images of CoNi-SP/C (a) before and (b) after cycling.

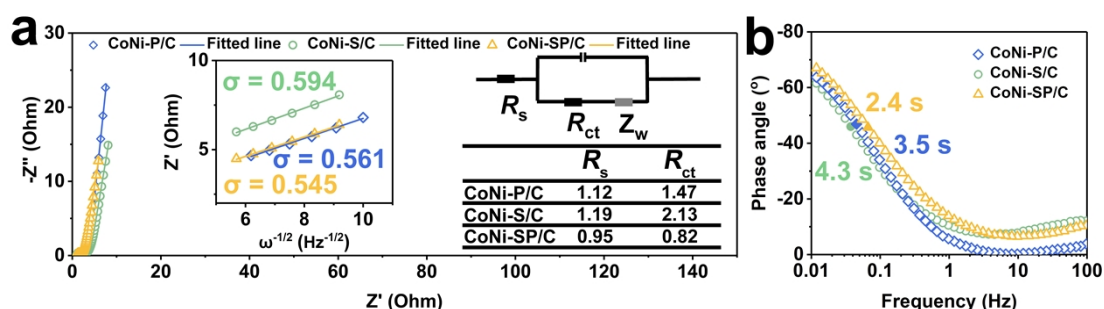

**Fig. S10** (a) EIS plots of CoNi-P/C, CoNi-S/C, and CoNi-SP/C electrodes. Insets indicate the  $Z'$  vs.  $\omega^{-1/2}$  plots in the low frequency range, fitted equivalent circuit, and resistance results. (b) The phase angle vs. frequency plots of CoNi-P/C, CoNi-S/C, and CoNi-SP/C electrodes.

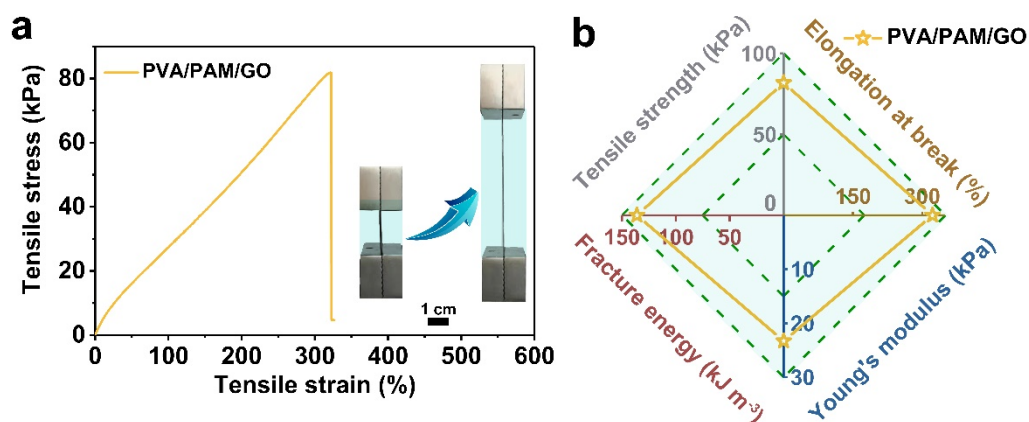

**Fig. S11** (a) Tensile stress–strain curves of the PVA/PAM/GO hydrogel. (b) The mechanical properties in terms of tensile strength, elongation at break, fracture energy, and Young's modulus of the PVA/PAM/GO hydrogel.

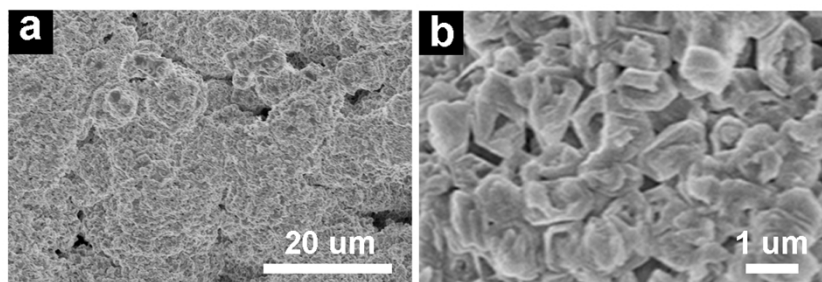

**Fig. S12** SEM images of the PVA/PAM/KOH hydrogel electrolyte.

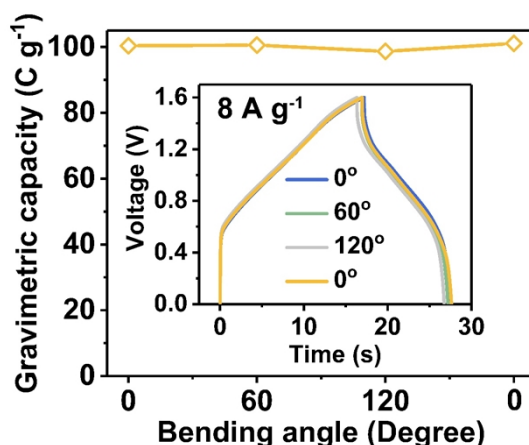

**Fig. S13** Gravimetric capacities of various bending states.

## References

- 1 M. Yi, C. Zhang, C. Cao, C. Xu, B. Sa, D. Cai and H. Zhang, *Inorg. Chem.*, 2019, **58**, 3916-3924.
- 2 X. Lei, S. Ge, Y. Tan, J. Li, Z. Wang, P. Liu, C. Feng and B. Xiang, *J. Mater. Chem. A*, 2019, **7**, 24908-24918.
- 3 H. Liang, C. Xia, Q. Jiang, A. N. Gandi, U. Schwingenschlögl and H. N. Alshareef, *Nano Energy*, 2017, **35**, 331.
- 4 Z. Li, H. Mi, F. Guo, C. Ji, S. He, H. Li and J. Qiu, *Inorg. Chem.*, 2021, **60**, 12197-12205.
- 5 S. He, F. Guo, Q. Yang, H. Mi, J. Li, N. Yang and J. Qiu, *Small*, 2021, **17**, 2100353.
- 6 W. Jiang, F. Hu, Q. Yan and X. Wu, *Inor. Chem. Front.*, 2017, **4**, 1642-1648.
- 7 V. T. Chebrolu, B. Balakrishnan, D. Chinnadurai and H. J. Kim, *Adv. Mater. Technol.*, 2019, **5**, 1900873.
- 8 B. Li, P. Gu, Y. Feng, G. Zhang, K. Huang, H. Xue and H. Pang, *Adv. Funct. Mater.*, 2017, **27**, 1605784.
- 9 X. Li, H. Wu, A. M. Elshahawy, L. Wang, S. J. Pennycook, C. Guan and J. Wang, *Adv. Funct. Mater.*, 2018, **28**, 1800036.
- 10 X. Zhang, A. Wu, X. Wang, C. Tian, R. An and H. Fu, *J. Mater. Chem. A*, 2018, **6**, 17905-17914.
- 11 D. Chu, X. Song, L. Tan, H. Ma, H. Pang, X. Wang and D. Guo, *Inorg. Chem. Commun.*, 2019, **110**, 107587.
- 12 X. Liu, L. Ye, Y. Du and L. Zhao, *Mater. Lett.*, 2020, **258**, 126812.
- 13 R. Bendi, V. Kumar, V. Bhavanasi, K. Parida and P. S. Lee, *Adv. Energy Mater.*, 2016, **6**, 1501833.
